# Supplementary material
Source: PubMed Central journal article supplement (PMC3200479)

## Supplement A

**Table 4. Multivariate Cox proportional hazard analysis of prognostic factors for mortality in 1,480 patients with HCV-related HCC, including change in serum AFP level determined for patients with multiple tests during the period 2 years before to 30 days after HCC diagnosis**

|                              | Adjusted Hazard Ratio (95% CI) | P-value |
|------------------------------|--------------------------------|---------|
| <b>Change in AFP (ng/ml)</b> |                                |         |
| No increase                  | Reference                      |         |
| <2-fold increase             | 1.38 (1.09-1.75)               | 0.0075  |
| 2-<10-fold increase          | 1.61 (1.29-2.02)               | <0.0001 |
| ≥10-fold increase            | 2.64 (2.10-3.33)               | <0.0001 |
| Unknown                      | 1.75 (1.45-2.11)               | <0.0001 |
| <b>Age</b>                   |                                |         |
| <50                          | Reference                      |         |
| 50-54                        | 1.06 (0.88-1.27)               | 0.58    |
| 55-59                        | 1.03 (0.86-1.25)               | 0.72    |
| ≥60                          | 1.19 (0.99-1.43)               | 0.07    |
| <b>Sex</b>                   |                                |         |
| Female                       | Reference                      |         |
| Male                         | 1.27 (0.65-2.45)               | 0.49    |
| <b>Race/Ethnicity</b>        |                                |         |
| White                        | Reference                      |         |
| Black                        | 1.13 (0.99-1.28)               | 0.08    |
| Other                        | 0.92 (0.77-1.10)               | 0.36    |
| Missing                      | 1.04 (0.82-1.33)               | 0.73    |
| *Ascites                     | 1.83 (1.60-2.10)               | <0.0001 |
| *Encephalopathy              | 1.32 (1.12-1.55)               | 0.0007  |
| *CHF                         | 1.26 (0.98-1.62)               | 0.08    |
| <b>MELD</b>                  |                                |         |
| <15                          | Reference                      |         |
| 15-20                        | 1.58 (1.32-1.90)               | <0.0001 |
| >20                          | 2.42 (1.73-3.41)               | <0.0001 |
| Missing                      | 0.97 (0.85-1.11)               | 0.65    |
| <b>HCC treatment</b>         |                                |         |
| Transplantation              | 0.17 (0.11-0.26)               | <0.0001 |
| Resection                    | 0.57 (0.43-0.76)               | 0.0001  |
| TACE                         | 0.77 (0.67-0.89)               | 0.0003  |
| RFA                          | 0.60 (0.48-0.75)               | <0.0001 |

\*Within 1 year before HCC diagnosis

## Figure Legends

### Figure 1.

**HCV cohort by serum AFP level at the time of HCC diagnosis**

^No serum AFP level tested between 60 days before to 30 days after HCC diagnosis

\*AFP in ng/ml

### Figure 2.

**Kaplan Meier curves of survival based on AFP category in 1,480 patients with HCV-related HCC; AFP levels are in ng/ml**

## Supplement A

### Figure 3.

**The change in serum AFP level during 2 years before to 30 days after HCC diagnosis among 1,480 HCV-infected patients with HCC.**

^Less than 2 recorded serum AFP levels

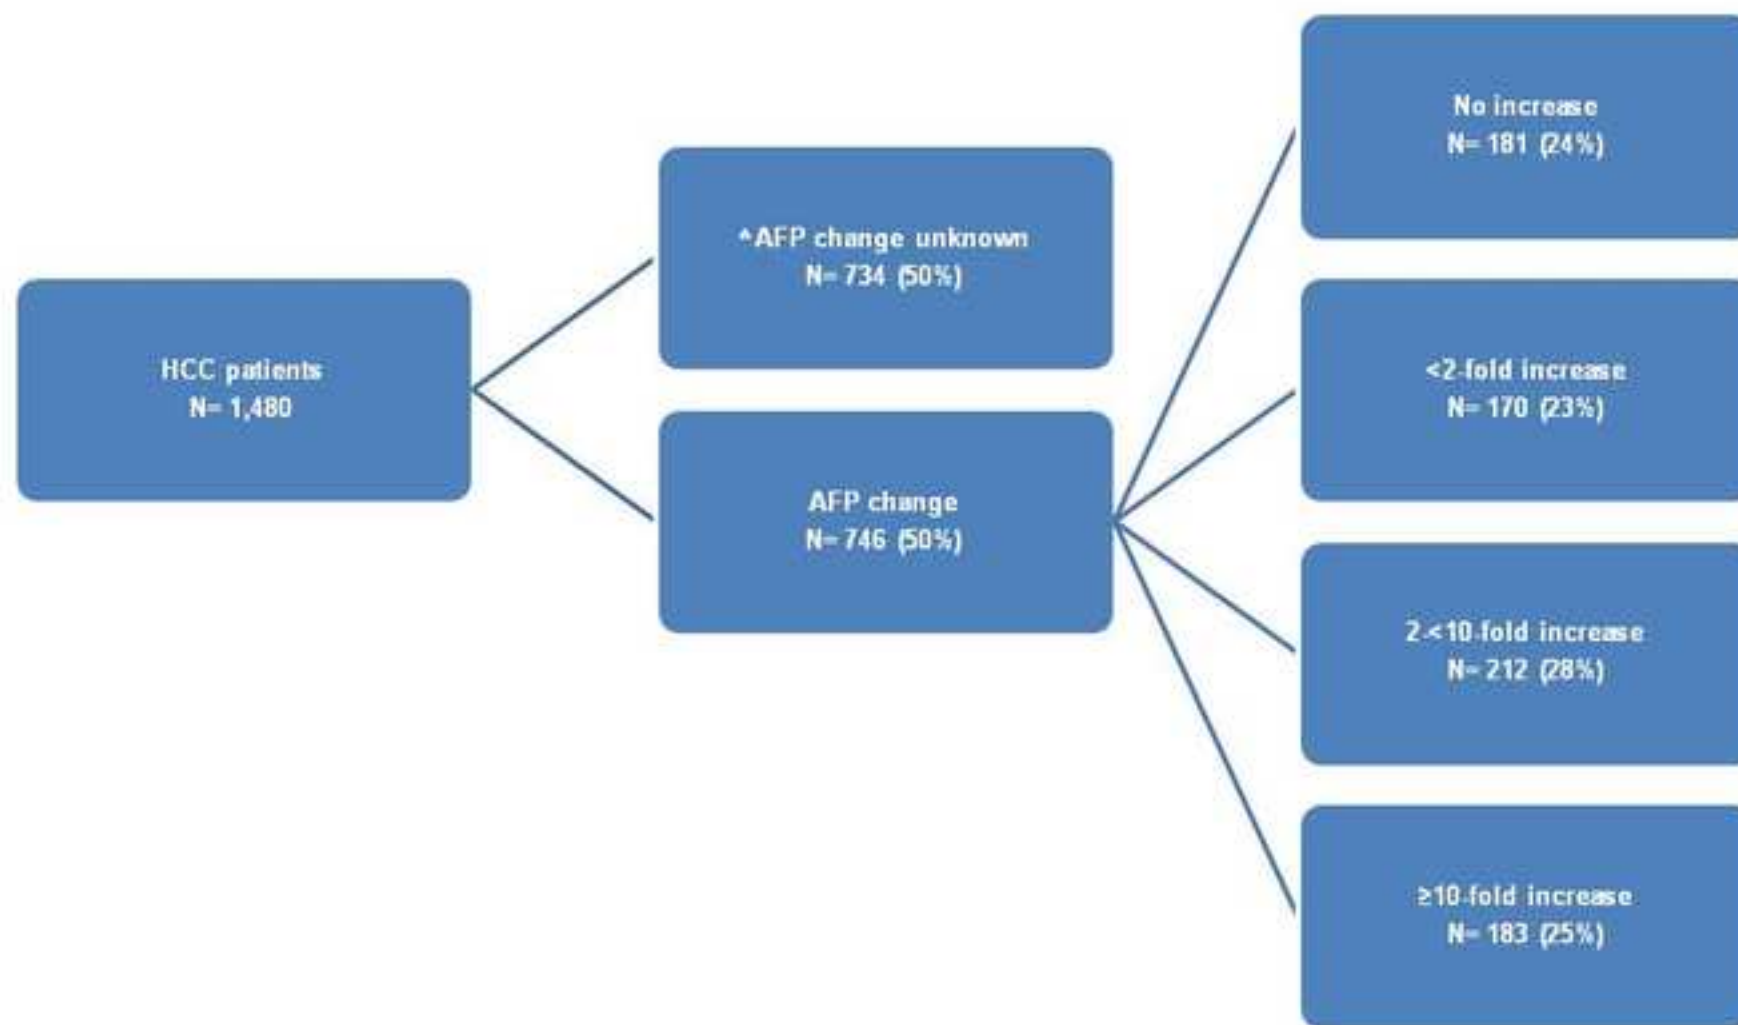

Supplement: NIHMS316720-supplement-1.pdf [file NIHMS316720-supplement-1.pdf]
